# Supplementary material
Source: ML conference proceedings conference paper supplement (https://openaccess.thecvf.com/content/cvpr_2015/html/Jiang_Revisiting_Kernelized_Locality-Sensitive_2015_CVPR_paper.html)
Supplement: Supplementary file 1 [file Jiang_Revisiting_Kernelized_Locality-Sensitive_2015_CVPR_supplemental.pdf]

# Supplementary Material to Revisiting Kernelized Locality-Sensitive Hashing for Improved Large-Scale Image Retrieval

Ke Jiang, Qichao Que, Brian Kulis

Department of Computer Science and Engineering  
The Ohio State University

{jiangk, que, kulis}@cse.ohio-state.edu

We first present a proof of Lemma 2 from the main text.

*Proof.* By the Pythagorean theorem, we have

$$N(\mathbf{x})^2 = \|P_{\hat{V}_k}^\perp(\Phi(\mathbf{x}))\|^2 = \|\Phi(\mathbf{x})\|^2 - \|P_{\hat{V}_k}^\perp(\Phi(\mathbf{x}))\|^2. \quad (1)$$

The residual  $P_{\hat{V}_k}^\perp(\Phi(\mathbf{x}))$  can be further decomposed into

$$P_{\hat{V}_k}^\perp(\Phi(\mathbf{x})) = P_{V_k}^\perp(\Phi(\mathbf{x})) + (P_{\hat{V}_k}^\perp(\Phi(\mathbf{x})) - P_{V_k}^\perp(\Phi(\mathbf{x}))). \quad (2)$$

For the first term, we have

$$\|P_{V_k}^\perp(\Phi(\mathbf{x}))\| \leq \sqrt{\lambda_k}. \quad (3)$$

Then applying Theorem 4 in [4], with probability at least  $1 - e^{-\xi}$ , we can also bound the second part of (2):

$$\|P_{\hat{V}_k}^\perp(\Phi(\mathbf{x})) - P_{V_k}^\perp(\Phi(\mathbf{x}))\| \leq \frac{2M}{\delta_k \sqrt{m}} \left(1 + \sqrt{\frac{\xi}{2}}\right), \quad (4)$$

where  $\delta_k = \frac{\lambda_k - \lambda_{k+1}}{2}$  and  $M = \sup_{\mathbf{x}} \kappa(\mathbf{x}, \mathbf{x}) = 1$ . Thus,

$$\|P_{\hat{V}_k}^\perp(\Phi(\mathbf{x}))\| \leq \sqrt{\lambda_k} + \frac{2}{\delta_k \sqrt{m}} \left(1 + \sqrt{\frac{\xi}{2}}\right). \quad (5)$$

Putting these pieces together, with probability at least  $1 - e^{-\xi}$ , we have

$$N(\mathbf{x}) = \sqrt{1 - \|P_{\hat{V}_k}^\perp(\Phi(\mathbf{x}))\|^2} \geq 1 - \|P_{\hat{V}_k}^\perp(\Phi(\mathbf{x}))\| \quad (6)$$

$$\geq 1 - \sqrt{\lambda_k} - \frac{2}{\delta_k \sqrt{m}} \left(1 + \sqrt{\frac{\xi}{2}}\right). \quad (7)$$

□

Our proof of Theorem 3, which is given below, requires a few prerequisite results, which we briefly summarize now. The first is regarding the upper bound of inner product of complement of projections onto the subspace from kernel principal component analysis.

**Lemma 1.** Consider a feature map  $\Phi \in \mathcal{H}$  defined by a normalized kernel function  $\kappa(\cdot, \cdot)$  in  $\mathcal{X}$  with a probability measure  $p$ . Let  $S_m = \{\mathbf{x}_1, \dots, \mathbf{x}_m\}$  be  $m$  i.i.d. samples drawn from  $p$  and  $C$  be the covariance operator of  $p$  with decreasing eigenvalues  $\lambda_1 \geq \lambda_2 \geq \dots$ . Let  $V_k$  and  $\hat{V}_k$  be the eigen-spaces corresponding the covariance operator  $C$  and its empirical counterpart  $C_{S_m}$ . Then, with probability at least  $1 - e^{-\xi}$  over the selection of  $S_m$ , we have

$$\begin{aligned} & \langle P_{\hat{V}_k}^\perp(\Phi(\mathbf{x})), P_{\hat{V}_k}^\perp(\Phi(\mathbf{y})) \rangle \\ & \leq \left( \sqrt{\lambda_k} + \frac{2}{\delta_k \sqrt{m}} \left(1 + \sqrt{\frac{\xi}{2}}\right) \right)^2. \end{aligned} \quad (8)$$

*Proof.* From Cauchy-Schwarz inequality, we have

$$\langle P_{\hat{V}_k}^\perp(\Phi(\mathbf{x})), P_{\hat{V}_k}^\perp(\Phi(\mathbf{y})) \rangle \leq \|P_{\hat{V}_k}^\perp(\Phi(\mathbf{x}))\| \|P_{\hat{V}_k}^\perp(\Phi(\mathbf{y}))\|. \quad (9)$$

Then, for any  $\mathbf{x} \in \mathcal{X}$ ,

$$\begin{aligned} & \|P_{\hat{V}_k}^\perp(\Phi(\mathbf{x}))\| \\ & \leq \|P_{V_k}^\perp(\Phi(\mathbf{x}))\| + \|P_{\hat{V}_k}^\perp(\Phi(\mathbf{x})) - P_{V_k}^\perp(\Phi(\mathbf{x}))\| \end{aligned} \quad (10)$$

$$\leq \|P_{V_k}^\perp(\Phi(\mathbf{x}))\| + \|P_{\hat{V}_k}^\perp - P_{V_k}^\perp\| \|\Phi(\mathbf{x})\|. \quad (11)$$

By the definition of operator norms, we have  $\|P_{\hat{V}_k}^\perp(\Phi(\mathbf{x}))\| \leq \sqrt{\lambda_k} \|\Phi(\mathbf{x})\|$ . Moreover, as stated in Theorem 4 in [4], with probability at least  $1 - e^{-\xi}$ , we have that

$$\|P_{\hat{V}_k}^\perp - P_{V_k}^\perp\| \leq \frac{2M}{\delta_k \sqrt{m}} \left(1 + \sqrt{\frac{\xi}{2}}\right) \quad (12)$$

where  $\delta_k = \frac{\lambda_k - \lambda_{k+1}}{2}$  and  $M = \sup_{\mathbf{x}} \kappa(\mathbf{x}, \mathbf{x}) = 1$ .

Hence, with probability at least  $1 - e^{-\xi}$  over  $S_m$ , we have

$$\begin{aligned} & \langle P_{\hat{V}_k}^\perp(\Phi(\mathbf{x})), P_{\hat{V}_k}^\perp(\Phi(\mathbf{y})) \rangle \\ & \leq \left( \sqrt{\lambda_k} + \frac{2}{\delta_k \sqrt{m}} \left(1 + \sqrt{\frac{\xi}{2}}\right) \right)^2 \|\Phi(\mathbf{x})\| \|\Phi(\mathbf{y})\|. \end{aligned} \quad (13)$$

Since  $\|\Phi(\mathbf{x})\| = 1$  for any  $\mathbf{x}$ , we have proved the lemma.  $\square$

For completeness, we also state the performance bound of standard LSH:

**Theorem 2.** [3, 2, 1]. *Let  $(X, d_X)$  be a metric space on a subset of  $\mathbb{R}^d$ . Suppose that  $(X, d_X)$  admits a similarity hashing family. Then for any  $\epsilon > 0$ , there exists a randomized algorithm for  $(1 + \epsilon)$ -near neighbor on  $n$ -point database with success probability larger than 0.5, which uses  $O(dn + n^{1+\frac{1}{1+\epsilon}})$  space, with query time dominated by  $O(n^{\frac{1}{1+\epsilon}})$  distance computations.*

Using the above results, we are ready to prove our main result in Theorem 3.

*Proof.* By the definition of  $P_{\hat{V}_k}$ , we can decompose  $\kappa(\mathbf{q}, \hat{\mathbf{y}}_{q,k})$  into two parts,

$$\kappa(\mathbf{q}, \hat{\mathbf{y}}_{q,k}) = \hat{\kappa}(\mathbf{q}, \hat{\mathbf{y}}_{q,k}) + \langle P_{\hat{V}_k}^\perp(\Phi(\mathbf{q})), P_{\hat{V}_k}^\perp(\Phi(\hat{\mathbf{y}}_{q,k})) \rangle. \quad (14)$$

Thus, by Lemma 1, we have

$$\begin{aligned} \kappa(\mathbf{q}, \hat{\mathbf{y}}_{q,k}) &\geq \hat{\kappa}(\mathbf{q}, \hat{\mathbf{y}}_{q,k}) - \left| \langle P_{\hat{V}_k}^\perp(\Phi(\mathbf{q})), P_{\hat{V}_k}^\perp(\Phi(\hat{\mathbf{y}}_{q,k})) \rangle \right| \quad (15) \\ &\geq \hat{\kappa}(\mathbf{q}, \hat{\mathbf{y}}_{q,k}) - \left( \sqrt{\lambda_k} + \frac{2}{\delta_k \sqrt{m}} \left( 1 + \sqrt{\frac{\xi}{2}} \right) \right)^2. \quad (16) \end{aligned}$$

To lower-bound  $\hat{\kappa}(\mathbf{q}, \hat{\mathbf{y}}_{q,k})$ , we need to use the result for LSH, which asks for normalized kernels. Thus, we consider the normalized version,

$$\hat{\kappa}_n(\mathbf{q}, \hat{\mathbf{y}}_{q,k}) = \frac{\hat{\kappa}(\mathbf{q}, \hat{\mathbf{y}}_{q,k})}{N(\mathbf{q})N(\hat{\mathbf{y}}_{q,k})}. \quad (17)$$

Then we can relate a distance function via  $\hat{d}(\mathbf{q}, \hat{\mathbf{y}}_{q,k}) = 1 - \hat{\kappa}_n(\mathbf{q}, \hat{\mathbf{y}}_{q,k})$  [1]. By the LSH guarantee in Theorem 2, with probability larger than 0.5, we have

$$\hat{d}(\mathbf{q}, \hat{\mathbf{y}}_{q,k}) \leq (1 + \epsilon)\hat{d}(\mathbf{q}, \mathbf{y}_{q,k}^*), \quad (18)$$

which is equivalent to

$$\hat{\kappa}_n(\mathbf{q}, \hat{\mathbf{y}}_{q,k}) \geq (1 + \epsilon)\hat{\kappa}_n(\mathbf{q}, \mathbf{y}_{q,k}^*) - \epsilon, \quad (19)$$

where  $\mathbf{y}_{q,k}^* = \arg\max_{\mathbf{x} \in S} \hat{\kappa}_n(\mathbf{q}, \mathbf{x})$ . Applying Lemma 2, with probability  $1 - e^{-\xi}$ , the true optimal  $\mathbf{y}_q^*$  with respect to  $\kappa$  is not eliminated for LSH, thus we have  $\hat{\kappa}_n(\mathbf{q}, \mathbf{y}_{q,k}^*) \geq \hat{\kappa}_n(\mathbf{q}, \mathbf{y}_q^*)$  due to the optimality of  $\mathbf{y}_{q,k}^*$  with respect to  $\hat{\kappa}_n$ , and with probability  $0.5 \times (1 - e^{-\xi})$

$$\hat{\kappa}_n(\mathbf{q}, \hat{\mathbf{y}}_{q,k}) \geq (1 + \epsilon)\hat{\kappa}_n(\mathbf{q}, \mathbf{y}_q^*) - \epsilon. \quad (20)$$

Expanding  $\hat{\kappa}_n$ , we get

$$\frac{\hat{\kappa}(\mathbf{q}, \hat{\mathbf{y}}_{q,k})}{N(\mathbf{q})N(\hat{\mathbf{y}}_{q,k})} \geq (1 + \epsilon) \frac{\hat{\kappa}(\mathbf{q}, \mathbf{y}_q^*)}{N(\mathbf{q})N(\mathbf{y}_q^*)} - \epsilon. \quad (21)$$

which can be reduced to

$$\hat{\kappa}(\mathbf{q}, \hat{\mathbf{y}}_{q,k}) \geq (1 + \epsilon)(1 - \sqrt{\lambda_k} - \eta)\hat{\kappa}(\mathbf{q}, \mathbf{y}_q^*) - \epsilon, \quad (22)$$

since  $1 - \sqrt{\lambda_k} - \eta \leq N(\mathbf{x}) \leq 1$ . Decompose  $\hat{\kappa}(\mathbf{q}, \mathbf{y}_q^*)$  on right hand-side above as

$$\hat{\kappa}(\mathbf{q}, \mathbf{y}_q^*) = \kappa(\mathbf{q}, \mathbf{y}_q^*) - \langle P_{\hat{V}_k}^\perp(\Phi(\mathbf{q})), P_{\hat{V}_k}^\perp(\Phi(\mathbf{y}_q^*)) \rangle. \quad (23)$$

Thus,

$$\begin{aligned} \hat{\kappa}(\mathbf{q}, \hat{\mathbf{y}}_{q,k}) &\geq (1 + \epsilon)(1 - \sqrt{\lambda_k} - \eta)\kappa(\mathbf{q}, \mathbf{y}_q^*) \quad (24) \\ &\quad - (1 + \epsilon) \left| \langle P_{\hat{V}_k}^\perp(\Phi(\mathbf{q})), P_{\hat{V}_k}^\perp(\Phi(\mathbf{y}_q^*)) \rangle \right| - \epsilon. \end{aligned}$$

Combining results in Equation 14 and 24,

$$\begin{aligned} \kappa(\mathbf{q}, \hat{\mathbf{y}}_{q,k}) &\geq \hat{\kappa}(\mathbf{q}, \hat{\mathbf{y}}_{q,k}) - \left| \langle P_{\hat{V}_k}^\perp(\Phi(\mathbf{q})), P_{\hat{V}_k}^\perp(\Phi(\hat{\mathbf{y}}_{q,k})) \rangle \right| \quad (25) \\ &\geq (1 + \epsilon)(1 - \sqrt{\lambda_k} - \eta)\kappa(\mathbf{q}, \mathbf{y}_q^*) - \epsilon \end{aligned}$$

$$\begin{aligned} &\quad - (1 + \epsilon) \left| \langle P_{\hat{V}_k}^\perp(\Phi(\mathbf{q})), P_{\hat{V}_k}^\perp(\Phi(\mathbf{y}_q^*)) \rangle \right| \\ &\quad - \left| \langle P_{\hat{V}_k}^\perp(\Phi(\mathbf{q})), P_{\hat{V}_k}^\perp(\Phi(\hat{\mathbf{y}}_{q,k})) \rangle \right| \quad (26) \end{aligned}$$

Now we can apply Lemma 1:

$$\begin{aligned} \kappa(\mathbf{q}, \hat{\mathbf{y}}_{q,k}) &\geq (1 + \epsilon)(1 - \sqrt{\lambda_k} - \eta)\kappa(\mathbf{q}, \mathbf{y}_q^*) - \epsilon \\ &\quad - (2 + \epsilon) \left( \sqrt{\lambda_k} + \eta \right)^2. \quad (27) \end{aligned}$$

$\square$

## References

- [1] M. Charikar. Similarity estimation techniques for rounding algorithms. In *ACM Symposium on Theory of Computing*, 2002. 2
- [2] M. Datar, N. Immorlica, P. Indyk, and V. Mirrokni. Locality-sensitive hashing scheme based on p-stable distributions. In *Proceedings of the Symposium on Computational Geometry*, 2004. 2
- [3] A. Gionis, P. Indyk, and R. Motwani. Similarity search in high dimension via hashing. In *Proceedings of the International Conference on Very Large DataBases*, 1999. 2
- [4] Z. Laurent and G. Blanchard. On the convergence of eigenspaces in kernel principal component analysis. In *Advances in Neural Information Processing Systems*, 2005. 1
